# Supplementary material
Source: Springer Nature journal article supplement (https://www.springermedizin.de/resource/supplementary/12889_2012_6524_MOESM2_ESM.pdf/9498118)

## Males

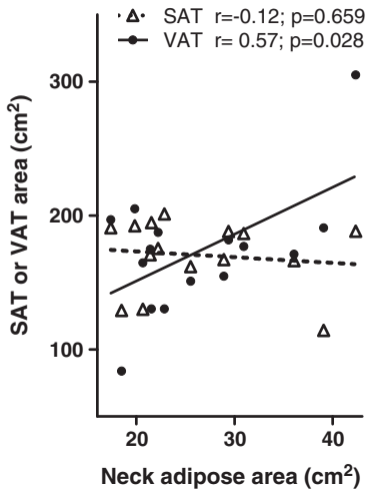

## Females

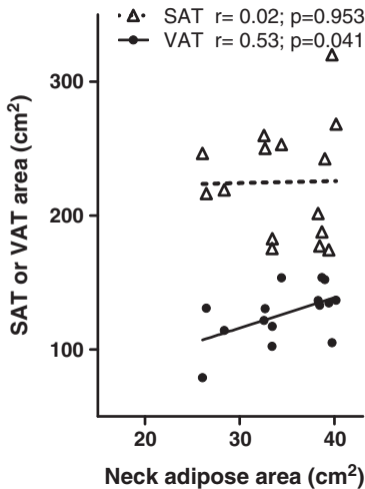

Supplement: MOESM2 [file 9498118]
